# Supplementary material for: Early Life Conditions and Physiological Stress following the Transition to Farming in Central/Southeast Europe: Skeletal Growth Impairment and 6000 Years of Gradual Recovery
Source: PLoS One. 2016 Feb 4;11(2):e0148468. doi: 10.1371/journal.pone.0148468 (PMC4742066; doi:10.1371/journal.pone.0148468)
Supplement: S1 Table — (XLSX) [file pone.0148468.s002.xlsx]

## Sheet: Sheet1
Site	Cultural Group	Individual #	Sex	Stature (cms)	Body Mass (kgs)	Brachial Index	Crural Index
Vlasac	Lepenski Vir	6	Male	167.97	80.41	-	-	XX	bold text indicates stature estimated from tibial length as per Ruff and colleagues (2012)
Vlasac	Lepenski Vir	17	Male	166.882	69.47	91.2587	-	XX	blue font colour indicates approximated limb proportion index
Vlasac	Lepenski Vir	24	Male	-	-	72.22	-	XX	turquoise font colour indicates supero-inferior femoral head breadth estimated from anteroposterior breadth as per Ruff (2000)
Vlasac	Lepenski Vir	26	Male	171.642	61.68	-	85.2878		purple cell indicates Stuttgart-Mühlhausen Area II
Vlasac	Lepenski Vir	27	Female	158.423	-	79.33	82.0212		grey cell indicates supero-inferior femoral head breadths measured off of 3D laser scan model
Vlasac	Lepenski Vir	28	Female	169.452	-	-	-	LBK	Linearbandkeramik
Vlasac	Lepenski Vir	29	Female	166.224	-	77.4924	-	ALP	Alföld Linear Pottery Culture
Vlasac	Lepenski Vir	31	Male	179.938	73.776	-	-
Vlasac	Lepenski Vir	32	Female	154.388	-	74.5819	-	Ruff CB, Holt BM, Niskanen M, Sládek V, Berner M, Garofalo E et al. 2012. Stature and body mass estimation from skeletal remains in the European Holocene. Am J Phys Anthropol 148:601-617.
Vlasac	Lepenski Vir	46	Female	155.868	58.9764	-	87.6812	Ruff CB. 2000. Body size, body shape, and long bone strength in modern humans. J Hum Evol 38:269–290.
Vlasac	Lepenski Vir	48	Female	158.827	-	76.699	-
Vlasac	Lepenski Vir	55	Female	163.803	61.4398	83.3783	83.6343
Vlasac	Lepenski Vir	57	Female	165.686	-	-	-
Vlasac	Lepenski Vir	60	Male	178.85	-	75.5927	-
Vlasac	Lepenski Vir	63	Female	158.692	-	-	-
Vlasac	Lepenski Vir	67	Female	165.686	-	-	87.1111
Vlasac	Lepenski Vir	73	Female	163.265	-	-	-
Vlasac	Lepenski Vir	78	Male	168.786	75.204	79.3701	83.9695
Vlasac	Lepenski Vir	80	Female	161.382	-	-	-
Vlasac	Lepenski Vir	11a	Male	178.034	-	-	-
Vlasac	Lepenski Vir	18a	Male	175.858	60.672	69.3715	85.3608
Vlasac	Lepenski Vir	18b	Male	174.498	-	-	-
Vlasac	Lepenski Vir	4b	Male	-	-	-	-
Vlasac	Lepenski Vir	50a	Male	175.586	-	-	-
Vlasac	Lepenski Vir	50b	Male	172.594	70.752	74.8571	86.6808
Vlasac	Lepenski Vir	78A	Male	168.786	75.204	85.3933	-
Vlasac	Lepenski Vir	80A	Female	158.423	-	-	-
Lepenski Vir	Lepenski Vir	1	Male	159.266	-	-	-
Lepenski Vir	Lepenski Vir	8	Female	162.008	57.1452	-	83.047
Lepenski Vir	Lepenski Vir	11	Female	137.78	-	-	-
Lepenski Vir	Lepenski Vir	13	Female	150.163	-	-	-
Lepenski Vir	Lepenski Vir	14	Female	150.432	55.0742	-	-
Lepenski Vir	Lepenski Vir	19	Female	156.893	54.4747	-	-
Lepenski Vir	Lepenski Vir	26	Possible Male	-	-	-	80.9689
Lepenski Vir	Lepenski Vir	29	Male	174.09	70.36	-	-
Lepenski Vir	Lepenski Vir	49	Male	162.394	66.496	-	-
Lepenski Vir	Lepenski Vir	60	Male	169.058	63.08	-	-
Lepenski Vir	Lepenski Vir	62	Male	179.666	73.804	-	-
Lepenski Vir	Lepenski Vir	64	Male	175.586	69.436	-	83.9545
Lepenski Vir	Lepenski Vir	69	Male	170.69	69.1	-	-
Lepenski Vir	Lepenski Vir	90	Male	161.442	-	-	-
Lepenski Vir	Lepenski Vir	91	Female	154.388	-	-	-
Lepenski Vir	Lepenski Vir	93	Female	165.013	55.7718	-	72.6058
Lepenski Vir	Lepenski Vir	27A	Female	152.505	52.262	-	-
Lepenski Vir	Lepenski Vir	27D	Male	176.13	-	-	-
Lepenski Vir	Lepenski Vir	32a	Female	150.622	52.3735	-	80.0505
Lepenski Vir	Lepenski Vir	45B	Male	174.498	81.868	84.59	-
Lepenski Vir	Lepenski Vir	52A	Female	153.85	-	-	-
Lepenski Vir	Lepenski Vir	54C	Female	156.271	54.3112	-	80.9697
Lepenski Vir	Lepenski Vir	54d	Female	157.347	-	-	-
Lepenski Vir	Lepenski Vir	54e	Female	151.294	48.992	-	-
Lepenski Vir	Lepenski Vir	7/I	Male	154.098	66.272	-	79.0123
Lepenski Vir	Lepenski Vir	83a	Female	152.774	-	-	84.6535
Vedrovice	LBK	1/85	Female	154.388	48.4252	74.7788	-
Vedrovice	LBK	9/74	Female	158.961	56.8509	-	-
Vedrovice	LBK	10/74	Male	156.07	57.9	77.9588	81.3028
Vedrovice	LBK	10/88	Female	143.83	45.2097	74.5283	81.4664
Vedrovice	LBK	15/75	Male	161.782	62.744	76.3723	78.2434
Vedrovice	LBK	22/75	Female	150.757	53.7553	72.9148	82.2306
Vedrovice	LBK	38/76	Female	148.201	48.9266	-	-
Vedrovice	LBK	46/77	Male	161.986	54.596	75.5627	81.9747
Vedrovice	LBK	54/78	Male	168.922	66.51	-	80.2717
Vedrovice	LBK	59/78	Male	163.346	56.08	76.3371	80.8046
Vedrovice	LBK	72/79	Female	154.859	51.6952	77.1012	80.9957
Vedrovice	LBK	73/79	Male	164.298	60.7	77.2182	80.0674
Vedrovice	LBK	75/79	Female	153.447	48.9266	73.2707	81.4198
Vedrovice	LBK	76/79	Male	160.286	57.088	81.0833	85.5317
Vedrovice	LBK	77/79	Male	163.482	70.598	76.0064	82.06
Vedrovice	LBK	79/79	Male	165.454	67.588	81.4634	82.7837
Vedrovice	LBK	81A/79	Female	158.154	56.5784	72.2716	83.8095
Vedrovice	LBK	86/80	Female	140.804	43.5311	-	81.875
Vedrovice	LBK	88/80	Male	155.458	53.112	-	84.0194
Vedrovice	LBK	97/80	Female	158.961	51.6516	76.7123	82.7465
Vedrovice	LBK	100/81	Female	149.68	50.9322	76.3373	79.7967
Vedrovice	LBK	101/81	Female	152.572	54.6936	76.6673	84.7772
Nitra Horné Krškany	LBK	1/64	Female	-	52.48	-	-
Nitra Horné Krškany	LBK	2/64	Male	166.61	67.896	74.2109	-
Nitra Horné Krškany	LBK	4/64	Male	166.066	68.204	75.9346	80.1438
Nitra Horné Krškany	LBK	8/64	Male	158.722	51.236	-	85.545
Nitra Horné Krškany	LBK	19/65	Male	164.298	66.048	76.941	85.1207
Nitra Horné Krškany	LBK	20/65	Female	153.984	52.7634	-	-
Nitra Horné Krškany	LBK	22/65	Possible Female	154.321	52.371	-	85.6967
Nitra Horné Krškany	LBK	24/65	Female	149.546	52.5454	75.5977	84.1635
Nitra Horné Krškany	LBK	25/65	Male	169.466	77.472	76.0773	81.9459
Nitra Horné Krškany	LBK	26/65	Possible Male	151.718	55.044	74.0216	81.3676
Nitra Horné Krškany	LBK	34/65	Male	162.802	73.286	78.2324	83.7684
Nitra Horné Krškany	LBK	36/65	Female	157.885	59.4342	73.466	80.8962
Nitra Horné Krškany	LBK	48/65	Possible Female	140.938	44.1524	-	83.6111
Nitra Horné Krškany	LBK	53/65	Female	153.514	50.8668	77.4648	83.3539
Nitra Horné Krškany	LBK	56/65	Male	165.658	65.264	76.5507	82.2742
Nitra Horné Krškany	LBK	58/65	Male	-	-	76.2186	-
Nitra Horné Krškany	LBK	61/65	Female	154.455	56.1642	73.4295	79.7075
Nitra Horné Krškany	LBK	62/65	Possible Male	161.918	70.192	-	-
Nitra Horné Krškany	LBK	64/65	Female	155.733	65.124	73.4694	82.0482
Nitra Horné Krškany	LBK	69/65	Male	165.522	60.728	75.6098	88.0133
Nitra Horné Krškany	LBK	70/65	Female	154.47	55.4012	76.1077	-
Nitra Horné Krškany	LBK	72/65	Male	162.938	60.378	74.22	81.8286
Stuttgart-Mühlhausen	LBK	15/201	Female	152.72	-	-	-
Stuttgart-Mühlhausen	LBK	20/208	Male	151.446	49.584	-	84.1509
Stuttgart-Mühlhausen	LBK	21/159	Female	144.704	45.5585	78.6239	-
Stuttgart-Mühlhausen	LBK	22/205	Male	163.142	55.982	76.9171	85.4214
Stuttgart-Mühlhausen	LBK	23/511	Female	152.236	51.172	-	85.0496
Stuttgart-Mühlhausen	LBK	25/207	Male	178.17	62.072	78.7454	81.8182
Stuttgart-Mühlhausen	LBK	26/195	Male	177.422	71.956	77.4718	-
Stuttgart-Mühlhausen	LBK	27/274	Female	143.09	51.4554	-	81.6076
Stuttgart-Mühlhausen	LBK	31/515	Female	164.139	54.8344	75.1592	84.0449
Stuttgart-Mühlhausen	LBK	32/209	Male	171.234	67.756	75.6918	-
Stuttgart-Mühlhausen	LBK	33/516	Female	155.464	54.8126	77.4026	81.3869
Stuttgart-Mühlhausen	LBK	34/517	Possible Female	144.973	42.7354	72.7955	80
Stuttgart-Mühlhausen	LBK	36/254	Male	154.642	47.386	80	84.0686
Stuttgart-Mühlhausen	LBK	38/518	Male	165.182	58.068	-	82.2969
Stuttgart-Mühlhausen	LBK	39/519	Male	167.834	75.316	-	-
Stuttgart-Mühlhausen	LBK	40/261	Male	-	55.954	-	-
Stuttgart-Mühlhausen	LBK	45/255	Female	-	-	75.1742	-
Stuttgart-Mühlhausen	LBK	47/258	Male	162.938	58.04	79.6148	83.6177
Stuttgart-Mühlhausen	LBK	48/260	Male	158.178	57.914	74.5955	81.7102
Stuttgart-Mühlhausen	LBK	50/524	Male	156.75	60.896	77.0085	80.2639
Stuttgart-Mühlhausen	LBK	56/528	Male	175.33	59.496	-	-
Stuttgart-Mühlhausen	LBK	57/333	Male	164.21	69.898	-	-
Stuttgart-Mühlhausen	LBK	58/529	Female	141.745	46.7575	74.2424	84.4444
Stuttgart-Mühlhausen	LBK	59/530	Female	158.26	55.8372	74.9788	-
Stuttgart-Mühlhausen	LBK	60/338	Male	164.162	60.532	-	85.3439
Stuttgart-Mühlhausen	LBK	61/531	Female	157.616	54.8453	74.3044	81.1568
Stuttgart-Mühlhausen	LBK	64/335	Male	159.266	56.85	77.8239	82.2695
Stuttgart-Mühlhausen	LBK	65/337	Female	158.019	57.1016	-	79.9762
Stuttgart-Mühlhausen	LBK	66/341	Male	161.918	58.978	77.4614	80.7692
Stuttgart-Mühlhausen	LBK	67/339	Male	158.246	55.954	77.3537	82.9888
Stuttgart-Mühlhausen	LBK	72/340	Male	167.086	59.174	76.372	85.1872
Stuttgart-Mühlhausen	LBK	77/379	Female	-	43.0515	-	-
Stuttgart-Mühlhausen	LBK	47/1254	Male	168.242	57.592	78.7009	85.4715
Stuttgart-Mühlhausen	LBK	48/1256	Male	-	69.128	-	-
Stuttgart-Mühlhausen	LBK	58/2734	Female	141.476	46.812	75.0757	80.9655
Stuttgart-Mühlhausen	LBK	75/3132	Male	155.322	53.644	76.1373	81.3219
Stuttgart-Mühlhausen	LBK	104/3232	Male	-	56.724	74.7557	-
Stuttgart-Mühlhausen	LBK	105/3233	Female	149.411	51.7388	74.0317	82.9897
Stuttgart-Mühlhausen	LBK	107/3230	Male	169.942	78.536	80.2432	86.9962
Stuttgart-Mühlhausen	LBK	108/3231	Male	155.594	52.58	73.3505	79.8552
Stuttgart-Mühlhausen	LBK	109/3232	Female	155.8	56.6002	76.3269	83.0621
Schwetzingen	LBK	4	Male	-	78.93	-	-
Schwetzingen	LBK	5	Male	-	-	76.9608	-
Schwetzingen	LBK	12	Female	159.364	50.7796	-	82.6651
Schwetzingen	LBK	16	Male	162.258	66.09	-	80.1378
Schwetzingen	LBK	28	Female	155.464	52.0222	76.5411	-
Schwetzingen	LBK	35	Male	156.07	56.164	-	85.5937
Schwetzingen	LBK	43	Male	161.442	57.116	-	84.5444
Schwetzingen	LBK	80	Male	165.046	67.882	-	-
Schwetzingen	LBK	82	Male	169.33	68.036	79.2169	83.3964
Schwetzingen	LBK	106	Male	156.614	59.076	-	-
Schwetzingen	LBK	107	Male	160.15	55.506	78.8871	83.1199
Schwetzingen	LBK	109	Female	148.739	51.9241	-	83.0541
Schwetzingen	LBK	119	Female	148.067	50.4962	73.3945	77.5113
Schwetzingen	LBK	122	Female	153.46	-	74.3714	-
Schwetzingen	LBK	133	Male	172.55	63.64	78.3969	-
Schwetzingen	LBK	137	Female	152.909	49.755	-	84.8447
Schwetzingen	LBK	143	Male	165.93	63.626	-	85.5636
Schwetzingen	LBK	154	Male	156.002	54.764	-	84.5642
Schwetzingen	LBK	157	Male	155.662	55.282	-	80.2178
Schwetzingen	LBK	169	Male	-	61.372	-	-
Schwetzingen	LBK	174	Possible Female	154.926	54.2676	-	-
Schwetzingen	LBK	176	Possible Female	154.03	-	-	-
Schwetzingen	LBK	183	Female	144.704	51.8696	-	-
Schwetzingen	LBK	184	Female	146.16	-	-	-
Schwetzingen	LBK	190	Female	155.733	54.006	-	85.8696
Schwetzingen	LBK	199	Female	-	56.6438	-	-
Schwetzingen	LBK	200	Male	161.986	61.12	-	81.9851
Schwetzingen	LBK	201	Female	151.429	50.7578	77.972	-
Schwetzingen	LBK	219	Female	155.599	56.2078	-	-
Schwetzingen	LBK	220	Male	169.262	59.496	-	80.6084
Polgár-Ferenci-hát	ALP	280	Male	-	64.088	-	-
Polgár-Ferenci-hát	ALP	291	Male	164.638	68.54	76.7606	83.9506
Polgár-Ferenci-hát	ALP	340	Possible Male	-	58.432	-	-
Polgár-Ferenci-hát	ALP	341	Male	168.378	69.576	73.5934	82.3529
Polgár-Ferenci-hát	ALP	486	Male	162.734	71.83	77.345	80.5919
Polgár-Ferenci-hát	ALP	697	Male	161.85	68.862	74.017	83.4873
Polgár-Ferenci-hát	ALP	715	Male	157.77	56.78	74.337	83.4129
Polgár-Ferenci-hát	ALP	768	Female	151.294	54.7581	-	81.1558
Polgár-Ferenci-hát	ALP	889	Female	149.008	51.6843	73.6283	77.6569
Polgár-Ferenci-hát	ALP	890	Male	168.922	67.574	71.964	82.6347
Hrtkovci-Gomolava (Neo)	Vinča	1/1	Male	158.722	55.968	-	81.464
Hrtkovci-Gomolava (Neo)	Vinča	2/2	Male	157.77	54.4	75.9899	78.8347
Hrtkovci-Gomolava (Neo)	Vinča	3/15	Male	167.698	62.884	77.6562	-
Hrtkovci-Gomolava (Neo)	Vinča	5/16	Male	157.37	-	74.816	-
Hrtkovci-Gomolava (Neo)	Vinča	7/18	Possible Male	-	-	76.128	-
Hrtkovci-Gomolava (Neo)	Vinča	11/22	Male	165.794	61.54	78.7761	85.0166
Hrtkovci-Gomolava (Neo)	Vinča	15/24	Male	167.698	68.148	-	82.4115
Hrtkovci-Gomolava (Neo)	Vinča	16/25	Male	173.614	73.02	-	-
Hrtkovci-Gomolava (Neo)	Vinča	18/27	Male	160.354	58.614	78.9127	-
Hrtkovci-Gomolava (Neo)	Vinča	20/29	Male	159.198	63.024	78.2178	83.4507
Hrtkovci-Gomolava (Neo)	Vinča	21/30	Male	166.066	69.044	-	85.255
Hrtkovci-Gomolava (Neo)	Vinča	22/31	Male	164.91	60.112	75.2818	77.1763
Hrtkovci-Gomolava (Neo)	Vinča	24/37	Male	-	-	78.6753	-
Hrtkovci-Gomolava (Neo)	Vinča	25/38	Possible Male	164.842	55.436	76.2646	81.075
Hrtkovci-Gomolava (Neo)	Vinča	10	Male	170.69	-	76.4239	85.3305
Hrtkovci-Gomolava (Neo)	Vinča	13	Male	161.034	62.324	75	79.5349
Hoštice 1 za Hanou	Bell Beaker	821	Male	164.026	63.64	76.8982	81.052
Hoštice 1 za Hanou	Bell Beaker	856	Female	151.967	48.1418	76.9791	-
Hoštice 1 za Hanou	Bell Beaker	861	Female	-	53.788	-	-
Hoštice 1 za Hanou	Bell Beaker	863	Male	178.578	79.684	76.7932	84.7082
Hoštice 1 za Hanou	Bell Beaker	870	Female	152.505	59.5432	-	85.7855
Hoštice 1 za Hanou	Bell Beaker	884	Male	173.41	72.852	75.7444	84.1053
Hoštice 1 za Hanou	Bell Beaker	904	Male	168.378	67.1975	-	-
Hoštice 1 za Hanou	Bell Beaker	908	Male	168.514	68.876	-	82.9857
Hoštice 1 za Hanou	Bell Beaker	915	Male	169.874	-	78.1931	85.7833
Hoštice 1 za Hanou	Bell Beaker	917	Male	167.154	69.044	-	82.8729
Hoštice 1 za Hanou	Bell Beaker	931	Male	170.7	-	79.6754	-
Hoštice 1 za Hanou	Bell Beaker	938	Male	168.786	58.88	-	87.3776
Brno-Tuřany	Únětice	807	Male	160.626	67.84	-	84.9013
Brno-Tuřany	Únětice	808	Possible Female	164.072	62.1156	-	85.9708
Brno-Tuřany	Únětice	809	Female	159.14	55.3794	77.5618	-
Brno-Tuřany	Únětice	812	Male	162.394	70.024	75.8509	82.5
Brno-Tuřany	Únětice	814	Male	166.61	67.742	78.5449	86.4745
Brno-Tuřany	Únětice	815	Possible Male	159.81	65.292	77.381	83.6879
Brno-Tuřany	Únětice	816	Female	155.195	59.7933	-	84.1849
Brno-Tuřany	Únětice	817	Male	180.89	80.79	77.686	85.281
Brno-Tuřany	Únětice	818	Female	161.91	-	-	-
Brno-Tuřany	Únětice	820	Male	162.666	63.024	-	-
Brno-Tuřany	Únětice	822	Male	169.806	68.54	77.2009	85.768
Brno-Tuřany	Únětice	823	Male	165.998	67.546	82.5409	88.0267
Brno-Tuřany	Únětice	825	Male	166.882	62.94	78.6145	85.8875
Brno-Tuřany	Únětice	830	Female	160.037	59.9246	76.7363	-
Brno-Tuřany	Únětice	836	Male	162.598	49.108	80.8163	87.2644
Brno-Tuřany	Únětice	837	Female	157.616	57.2106	78.1656	-
Brno-Tuřany	Únětice	839	Possible Female	161.77	-	80.8917	-
Polgár Kenderföld	Füzesabony	63/78	Male	169.874	69.968	71.2012	-
Polgár Kenderföld	Füzesabony	80/129	Male	166.066	65.88	-	84.3333
Polgár Kenderföld	Füzesabony	84/101	Male	160.49	63.78	79.6742	87.8841
Polgár Kenderföld	Füzesabony	98/118	Male	157.022	53.504	79.6653	84.3243
Polgár Kenderföld	Füzesabony	109/130	Male	160.422	59.328	-	-
Polgár Kenderföld	Füzesabony	130/153	Male	160.626	62.772	77.0612	84.6737
Polgár Kenderföld	Füzesabony	137/167	Female	158.288	52.7089	-	86.5089
Polgár Kenderföld	Füzesabony	147/181	Male	162.122	63.22	-	83.3717
Polgár Kenderföld	Füzesabony	289/353	Female	166.358	57.7229	78.0447	84.1989
Polgár Kenderföld	Füzesabony	290/354	Male	164.26	-	72.5191	-
Polgár Kenderföld	Füzesabony	302/367	Male	164.23	60.308	-	87.3096
Polgár Kenderföld	Füzesabony	337/438	Female	154.254	55.3794	69.3493	85.0244
Polgár Kenderföld	Füzesabony	338/439	Female	156.136	50.4962	81.7568	87.0303
Polgár Kenderföld	Füzesabony	370/498	Male	167.494	67.028	74.3685	82.6733
Polgár Kenderföld	Füzesabony	395/593	Male	156.41	56.78	-	83.213
Polgár Kenderföld	Füzesabony	403/608	Male	163.686	70.864	74.4409	81.7204
Polgár Kenderföld	Füzesabony	416/624	Male	-	51.376	-	-
Polgár Kenderföld	Füzesabony	417/625	Female	156.136	52.9705	78.9696	81.5505
Polgár Kenderföld	Füzesabony	437/645	Male	161.85	60.14	77.0324	83.4003
Polgár Kenderföld	Füzesabony	444/653	Possible Female	163.131	62.0284	-	82.4
Polgár Kenderföld	Füzesabony	449/658	Male	166.4	57.732	78.9432	-
Polgár Kenderföld	Füzesabony	466/712	Male	181.298	71.172	78.3562	90.0204
Polgár Kenderföld	Füzesabony	480/728	Male	175.99	-	82.2402	-
Polgár Kenderföld	Füzesabony	124/512	Female	-	75.2828	-	-
Ostojićevo	Maros	6	Female	155.262	59.0418	75.117	84.5783
Ostojićevo	Maros	7	Female	150.488	53.6572	-	83.6709
Ostojićevo	Maros	28	Female	151.967	56.8836	73.2759	-
Ostojićevo	Maros	30	Female	158.087	52.4691	76.699	83.6808
Ostojićevo	Maros	34	Male	164.774	69.534	72.7273	80.0895
Ostojićevo	Maros	41	Male	153.06	-	-	-
Ostojićevo	Maros	42	Female	151.429	50.9867	70.0615	82.8931
Ostojićevo	Maros	49	Male	169.942	72.194	-	82.2139
Ostojićevo	Maros	51	Female	-	49.5806	-	-
Ostojićevo	Maros	52	Male	164.59	75.148	-	-
Ostojićevo	Maros	53	Male	175.314	77.22	80.2572	85.0467
Ostojićevo	Maros	56	Possible Female	157.145	50.9758	75.1007	85.1303
Ostojićevo	Maros	57	Female	149.479	55.7936	75.856	91.316
Ostojićevo	Maros	58	Male	159.266	59.972	74.4663	78.4832
Ostojićevo	Maros	59	Male	183.066	93.978	75.7493	81.6456
Ostojićevo	Maros	63	Male	172.594	73.51	76.2763	80.4097
Ostojićevo	Maros	64	Female	142.418	48.5887	72.6761	81.4714
Ostojićevo	Maros	66	Male	166.746	72.81	76.3636	83.8462
Ostojićevo	Maros	67	Possible Female	158.827	-	76.1945	83.848
Ostojićevo	Maros	68	Female	159.163	61.2	76.461	82.4664
Ostojićevo	Maros	69	Female	144.704	45.722	74.2438	84.6051
Ostojićevo	Maros	71	Male	156.546	55.142	78.7108	83.7055
Ostojićevo	Maros	78	Female	148.672	53.0468	73.6842	80.7692
Ostojićevo	Maros	81	Female	148.537	60.8294	76.0345	83.2799
Ostojićevo	Maros	82	Female	156.069	57.2106	75.5444	85.5763
Ostojićevo	Maros	82b	Male	172.73	81.336	-	83.4746
Ostojićevo	Maros	84	Possible Female	157.885	59.3252	75.9076	83.5511
Ostojićevo	Maros	96	Female	148.739	53.352	75.934	84.1463
Ostojićevo	Maros	98	Possible Male	160.354	55.66	74.808	-
Ostojićevo	Maros	106	Male	163.21	55.786	-	81.1791
Ostojićevo	Maros	107	Male	158.994	52.384	76.2869	-
Ostojićevo	Maros	114	Possible Female	153.783	55.5102	72.7806	83.0864
Ostojićevo	Maros	120	Possible Female	149.008	57.276	72.886	-
Ostojićevo	Maros	121	Male	155.47	-	-	-
Ostojićevo	Maros	129	Male	172.39	65.572	77.5976	83.5188
Ostojićevo	Maros	138	Female	151.241	52.5	-	-
Ostojićevo	Maros	141	Male	165.794	62.156	79.0123	82.0156
Ostojićevo	Maros	146	Possible Female	156.204	56.0552	76.865	82.5378
Ostojićevo	Maros	155	Female	158.827	62.3336	73.9408	83.0978
Ostojićevo	Maros	156	Male	157.226	64.732	-	85.8084
Ostojićevo	Maros	171b	Male	169.058	68.148	75.2547	-
Ostojićevo	Maros	171c	Male	169.058	68.484	77.4496	83.3874
Ostojićevo	Maros	193	Female	147.69	52.262	-	-
Ostojićevo	Maros	197	Male	160.898	59.692	78.1323	82.0186
Ostojićevo	Maros	199	Male	158.518	60.406	76.0064	84.3694
Ostojićevo	Maros	208	Female	144.839	48.3053	75.419	83.7458
Ostojićevo	Maros	215	Female	151.16	49.0467	-	82.5596
Ostojićevo	Maros	223	Male	163.074	62.436	77.7955	84.6108
Ostojićevo	Maros	224	Female	149.546	54.0278	75.7904	84.4872
Ostojićevo	Maros	229	Male	170.554	73.524	-	81.7308
Ostojićevo	Maros	251	Male	153.622	57.088	77.2379	81.678
Ostojićevo	Maros	256	Female	147.865	57.2325	-	80.8566
Ostojićevo	Maros	266	Male	158.858	49.822	-	83.0389
Ostojićevo	Maros	273	Male	158.994	71.83	-	85.5124
Ostojićevo	Maros	274	Male	156.07	57.802	76.6129	83.8983
Ostojićevo	Maros	280	Female	151.362	49.4934	-	84.2569
Brno-Maloměřice	Celtic	1	Male	176.946	65.9886	-	80.5041
Brno-Maloměřice	Celtic	3	Male	156.886	57.928	74.3506	85.4556
Brno-Maloměřice	Celtic	13	Possible Male	-	52.412	-	-
Brno-Maloměřice	Celtic	18	Male	169.33	58.782	-	81.8281
Brno-Maloměřice	Celtic	20	Male	162.734	68.302	81.348	84.4394
Brno-Maloměřice	Celtic	23	Male	-	61.904	-	-
Brno-Maloměřice	Celtic	24	Male	-	62.492	-	-
Brno-Maloměřice	Celtic	26	Male	170.554	87.664	-	83.5484
Brno-Maloměřice	Celtic	34	Female	160.104	58.8892	-	83.0321
Brno-Maloměřice	Celtic	36	Male	164.774	67.756	-	86.2712
Brno-Maloměřice	Celtic	40	Female	149.613	56.186	74.3007	86.343
Brno-Maloměřice	Celtic	41	Female	153.648	56.7201	72.1106	82.8857
Brno-Maloměřice	Celtic	49	Male	-	61.456	-	-
Brno-Maloměřice	Celtic	51	Male	166.61	66.146	-	83.9644
Brno-Maloměřice	Celtic	65	Male	166.882	71.326	-	88.2682
Brno-Maloměřice	Celtic	66	Possible Female	-	55.6785	-	-
Brno-Maloměřice	Celtic	67	Female	150.622	52.4255	-	84.0909
Brno-Maloměřice	Celtic	74-I	Male	-	40.568	-	-
Brno-Maloměřice	Celtic	75	Male	169.738	69.856	-	83.4054
Brno-Maloměřice	Celtic	76	Possible Male	160.354	56.22	-	84.4262
Tápiószele	Scythian	4283	Male	168.31	60.56	-	82.7811
Tápiószele	Scythian	4940	Male	166.82	-	-	-
Tápiószele	Scythian	5092	Male	166.406	73.202	-	-
Tápiószele	Scythian	5094	Male	167.834	62.366	77.0312	83.6443
Tápiószele	Scythian	5097	Female	154.791	55.7936	-	85.5746
Tápiószele	Scythian	5099	Male	174.226	75.064	-	-
Tápiószele	Scythian	5100	Male	161.986	65.824	-	-
Tápiószele	Scythian	5106	Female	161.584	58.6712	73.5833	-
Tápiószele	Scythian	5876	Female	137.576	45.2097	78.0318	-
Tápiószele	Scythian	5883	Female	150.084	59.0418	77.3723	-
Tápiószele	Scythian	5887	Female	146.318	57.5376	75.5941	-
Tápiószele	Scythian	5888	Female	156.809	54.9216	-	-
Tápiószele	Scythian	5889	Female	157.078	56.7637	-	-
Tápiószele	Scythian	5890	Male	-	66.44	-	-
Tápiószele	Scythian	5893	Male	-	59.1558	-	-
Tápiószele	Scythian	6030	Possible Male	163.822	55.996	-	81.2641
Tápiószele	Scythian	6031	Possible Female	154.186	59.1508	-	83.6685
Tápiószele	Scythian	6032	Possible Female	156.069	55.2268	75.7946	-
Tápiószele	Scythian	6033	Possible Female	157.616	59.5759	-	-
Tápiószele	Scythian	7609	Male	163.074	69.66	-	84.5455
Tápiószele	Scythian	7610	Female	152.976	53.8098	76.9297	84.3537
Tápiószele	Scythian	7613	Female	152.37	58.6603	79.3706	85.2665
Tápiószele	Scythian	7615	Male	168.514	64.648	-	-
Tápiószele	Scythian	7618A	Female	147.932	53.5373	-	85.8436
Tápiószele	Scythian	7618C	Female	151.227	52.6	-	82.4418
Tápiószele	Scythian	7618D	Female	-	-	75.2406	-
Tápiószele	Scythian	7620	Female	154.254	58.2243	-	78.7454
Tápiószele	Scythian	9038	Male	164.162	67.896	76.0802	82.6185
Hrtkovci-Gomolava (Iron Age)	Bosut	24	Possible Female	151.16	48.992	-	-
Hrtkovci-Gomolava (Iron Age)	Bosut	46	Possible Male	-	63.08	78.2573	-
Hrtkovci-Gomolava (Iron Age)	Bosut	3/49	Possible Male	156.138	54.456	71.1948	83.5766
Hrtkovci-Gomolava (Iron Age)	Bosut	4/50	Female	149.68	50.8014	-	-
Hrtkovci-Gomolava (Iron Age)	Bosut	5/51	Male	155.73	63.052	74.7573	-
Hrtkovci-Gomolava (Iron Age)	Bosut	11/55	Female	159.23	56.0552	74.6795	85.1225
Hrtkovci-Gomolava (Iron Age)	Bosut	12/56	Female	151.832	56.4367	-	78.7234
Hrtkovci-Gomolava (Iron Age)	Bosut	14/58	Female	150.084	47.9674	76.4085	84.0506
Hrtkovci-Gomolava (Iron Age)	Bosut	16/60	Possible Male	153.826	49.738	76.4025	83.867
Hrtkovci-Gomolava (Iron Age)	Bosut	19/63	Female	156.002	53.0468	78.7986	81.8841
Hrtkovci-Gomolava (Iron Age)	Bosut	20/64	Female	143.493	47.2807	-	87.6601
Hrtkovci-Gomolava (Iron Age)	Bosut	22/66	Female	-	48.9484	-	-
Hrtkovci-Gomolava (Iron Age)	Bosut	23/67	Female	-	53.2648	-	-
Hrtkovci-Gomolava (Iron Age)	Bosut	28/72	Possible Female	145.377	47.8148	-	85.3723
Hrtkovci-Gomolava (Iron Age)	Bosut	29a/73a	Possible Male	156.818	63.78	-	91.226
Hrtkovci-Gomolava (Iron Age)	Bosut	29b/73b	Male	151.67	-	-	-
Hrtkovci-Gomolava (Iron Age)	Bosut	35/79	Male	-	44.0051	-	-
Hrtkovci-Gomolava (Iron Age)	Bosut	49/92	Female	161.613	52.7307	70.6068	-
Hrtkovci-Gomolava (Iron Age)	Bosut	50/93	Female	156.435	59.8048	73.7607	86.1945
Hrtkovci-Gomolava (Iron Age)	Bosut	53/96	Female	156.58	54.5074	-	-
Hrtkovci-Gomolava (Iron Age)	Bosut	54/97	Female	151.392	59.5868	71.6418	84.6442
Hrtkovci-Gomolava (Iron Age)	Bosut	60/104	Male	145.938	55.94	-	85.298
Hrtkovci-Gomolava (Iron Age)	Bosut	65/109	Female	148.07	52.46	-	83.3766
Pottenbrunn	Slavic	22338	Female	164.1	-	-	-
Pottenbrunn	Slavic	22339	Female	163.03	66.1305	-	83.9548
Pottenbrunn	Slavic	22344	Female	154.859	56.72	-	83.1208
Pottenbrunn	Slavic	22347	Female	161.248	63.1	77.6213	85.2064
Pottenbrunn	Slavic	22349	Female	158.26	-	-	82.5117
Pottenbrunn	Slavic	22351	Male	159.538	40.37	73.2861	82.2695
Pottenbrunn	Slavic	22360	Male	167.2	69.8526	77.7778	83.2691
Pottenbrunn	Slavic	22367	Female	163.265	55.64	-	86.5714
Pottenbrunn	Slavic	22385	Female	151.92	52.4771	73.7705	86.3693
Pottenbrunn	Slavic	22387	Female	157.481	46.5	76.8212	84.6154
Pottenbrunn	Slavic	22390	Female	163.198	51.82	-	84.6459
Pottenbrunn	Slavic	22392	Female	159.499	-	-	-
Pottenbrunn	Slavic	22400	Female	155.935	51.26	74.3197	83.3133
Pottenbrunn	Slavic	22405	Female	160.43	66.0396	-	84.1288
Pottenbrunn	Slavic	22411	Female	153.6	45.3438	73.5537	85.0856
Pottenbrunn	Slavic	22416	Female	156.271	52.6	75.2435	84.058
Pottenbrunn	Slavic	22421	Male	164.23	56.81	-	82.2964
Pottenbrunn	Slavic	22424	Male	156.54	50.9685	76.6497	83.0144
Pottenbrunn	Slavic	22432	Female	159.97	54.94	72.8435	84.6698
Pottenbrunn	Slavic	22435	Female	157.64	57.3765	75.082	84.4287
Pottenbrunn	Slavic	22438	Female	160.239	55.71	-	-
Pottenbrunn	Slavic	22442	Male	161.442	48.02	76.1453	86.0358
Pottenbrunn	Slavic	22446	Female	150.757	50.95	-	82.6389
Pottenbrunn	Slavic	22448	Female	140.131	44.32	77.6415	85.7544
Pottenbrunn	Slavic	22462	Male	-	-	75.8089	-
Pottenbrunn	Slavic	22481	Male	178.85	76.24	75.2011	87.8712
Pottenbrunn	Slavic	22483	Male	172.39	65.03	75.3446	79.4492
Pottenbrunn	Slavic	22484	Male	173.048	65.4493	76.6917	84.953
Pottenbrunn	Slavic	22486	Female	149.399	54.8306	-	84.5321
Pottenbrunn	Slavic	22492	Male	164.933	73.4662	74.6106	83.165
Pottenbrunn	Slavic	22495	Female	158.728	55.2984	-	86.2537
Pottenbrunn	Slavic	22496	Male	151.142	68.9331	75.0613	83.9352
Pottenbrunn	Slavic	22505	Male	176.174	76.4875	75.1715	85.0434
Pottenbrunn	Slavic	22506	Male	164.092	69.1475	76.5539	83.7761
Pottenbrunn	Slavic	22507	Male	165.944	57.214	-	85.7304
Pottenbrunn	Slavic	22509	Female	164.534	61.9238	74.7581	81.743
Pottenbrunn	Slavic	22510	Female	163.122	67.1989	-	83.6207
Pottenbrunn	Slavic	22514	Male	164.512	71.5104	-	83.4171
Pottenbrunn	Slavic	22521	Male	172.955	84.4926	76.5684	81.7799
Pottenbrunn	Slavic	22523	Male	166.226	73.8908	76.935	83.251
Pottenbrunn	Slavic	22526	Female	158.364	55.2948	73.5225	83.5488
Pottenbrunn	Slavic	22527	Male	173.209	80.4415	76.5135	83.9623
